# Supplementary material for: Material-independent film formation and autonomous degradation of Cu2+-tetrahydroxy-1,4-benzoquinone metal–organic complexes
Source: Royal Society of Chemistry journal article supplement (doi:10.1039/d4nr03496a), 2024-11-05
Supplement: d4nr03496a1.pdf [file d4nr03496a1.pdf]

## Electronic Supporting Information

### Material-independent film formation and autonomous degradation of Cu<sup>2+</sup>-tetrahydroxy-1,4-benzoquinone metal-organic complex

*Hyeong Bin Rheem, Duc Tai Nguyen, and Insung S. Choi\**

Department of Chemistry, KAIST, Daejeon 34141, Republic of Korea

#### Table of Contents

- **Fig. S1** XRD spectra of Cu<sup>2+</sup>-THBQ MOC and Cu<sup>2+</sup>-THBQ MOF.
- **Fig. S2** UV-vis spectra of Cu<sup>2+</sup>, RA, and Cu<sup>2+</sup>+RA solutions.
- **Fig. S3** UV-vis spectra and optical images of Cu<sup>2+</sup>-THBQ MOC solutions under open and Ar-purged conditions.
- **Fig. S4** Optical images of a Cu<sup>2+</sup>-THBQ MOF suspension after 48 h of incubation in air and UV-vis spectrum of its supernatant.
- **Fig. S5** Film thicknesses of Cu<sup>2+</sup>-THBQ MOC films on gold substrates under various conditions.
- **Fig. S6** FE-SEM image of Cu<sup>2+</sup>-HHB MOC.
- **Fig. S7** FE-SEM and AFM images, and FT-IR, Raman, and XPS spectra of [Cu<sup>2+</sup>-THBQ]<sub>10</sub> films.
- **Fig. S8** FE-SEM images of PS particles after repetitive shell formation and degradation.
- **Fig. S9** FE-SEM, CLSM, and AFM images of a hollow Cu<sup>2+</sup>-THBQ MOC capsule.

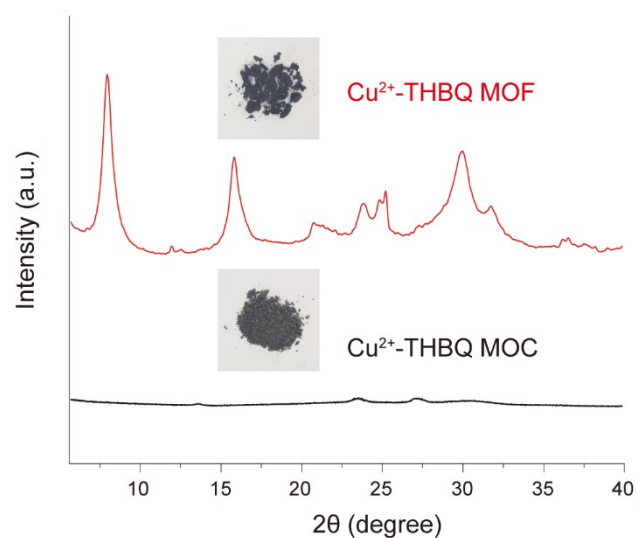

**Fig. S1** X-ray diffraction patterns of  $\text{Cu}^{2+}$ -THBQ MOC and as-synthesized  $\text{Cu}^{2+}$ -THBQ MOF. Insets are the optical appearances of each metal-organic species.

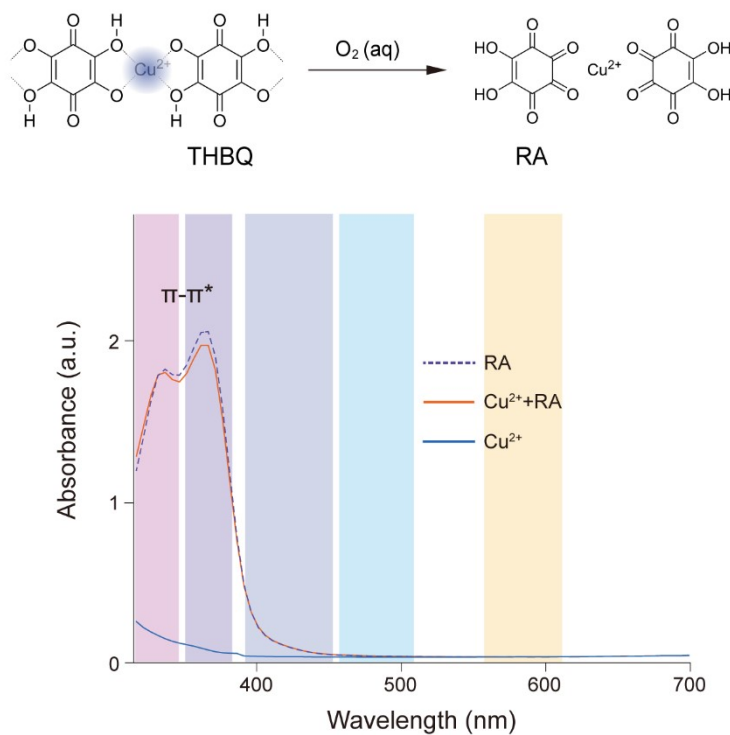

**Fig. S2** UV-vis spectra of  $\text{Cu}^{2+}$ , RA, and  $\text{Cu}^{2+}$ +RA solutions with the final concentrations of 1 mM. THBQ undergoes aqueous  $\text{O}_2$ -driven oxidation, which leads to the degradation of  $\text{Cu}^{2+}$ -THBQ MOC in air.

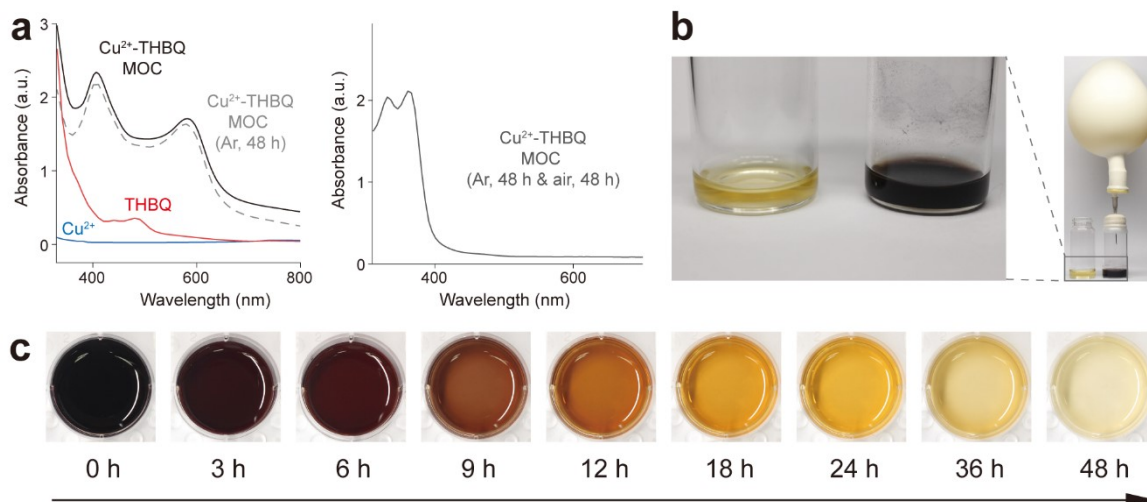

**Fig. S3** a) (left) UV-vis spectra of  $\text{Cu}^{2+}$  (cyan), THBQ (red), and  $\text{Cu}^{2+}$ -THBQ MOC (black) solutions, and a  $\text{Cu}^{2+}$ -THBQ MOC solution purged with Ar for 48 h (gray, dotted). (right) UV-vis spectrum of a  $\text{Cu}^{2+}$ -THBQ MOC solution after purging with Ar for 48 h and subsequent exposure to air for 48 h. b) Optical images of  $\text{Cu}^{2+}$ -THBQ MOC solutions under open (left) and Ar-purged (right) conditions after 48 h. c) Optical images of  $\text{Cu}^{2+}$ -THBQ MOC solutions exposed to air after the predetermined time.

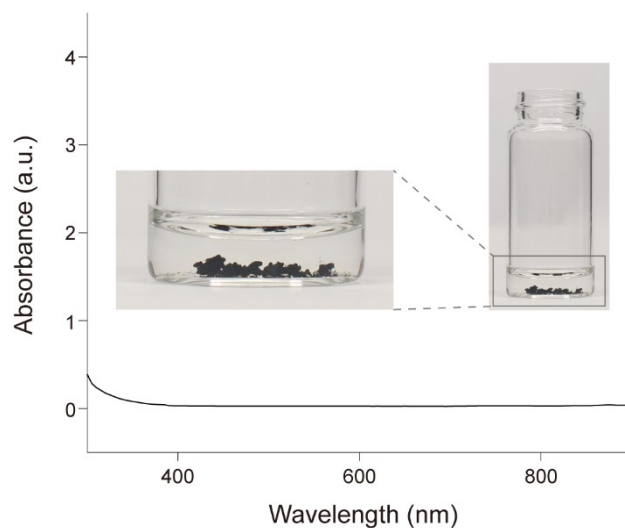

**Fig. S4** Optical images of a  $\text{Cu}^{2+}$ -THBQ MOF suspension after 48 h of incubation in air and UV-vis spectrum of its supernatant.

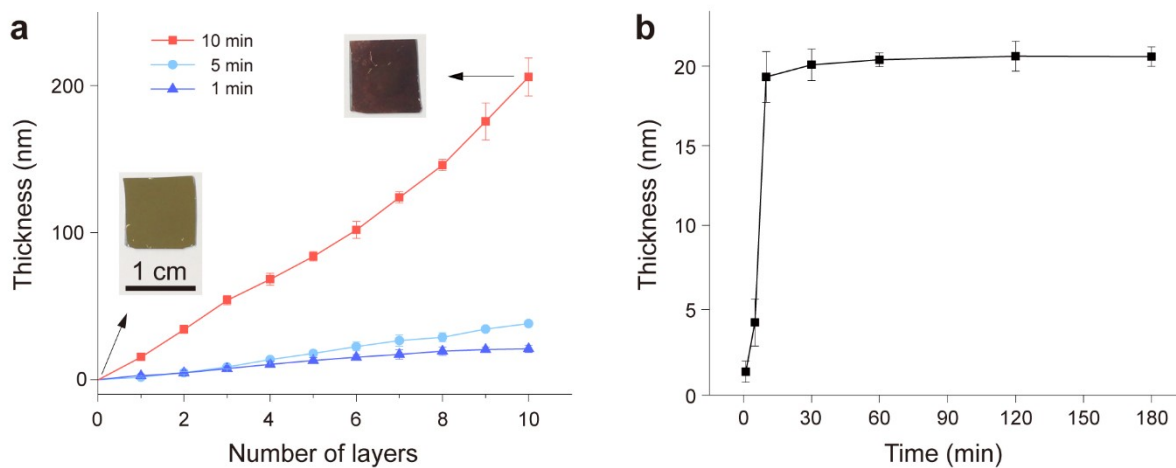

**Fig. S5** a) Film thickness of  $\text{Cu}^{2+}$ -THBQ MOC films on gold substrates with respect to the number of film layers. Incubation time varies from 1 to 10 min. Insets are the optical images of a bare gold substrate and a gold substrate coated with 10 layers of  $\text{Cu}^{2+}$ -THBQ MOC films. Scale bar: 1 cm. b) Film thickness of  $\text{Cu}^{2+}$ -THBQ MOC films on gold substrates with respect to incubation time.

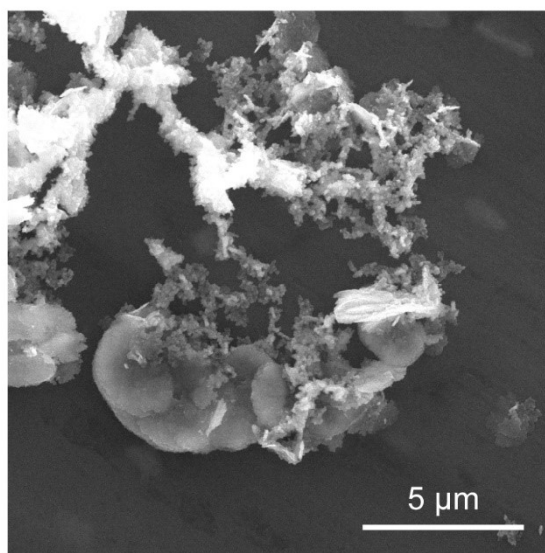

**Fig. S6** FE-SEM image of  $\text{Cu}^{2+}$ -HHB MOC on a gold substrate.

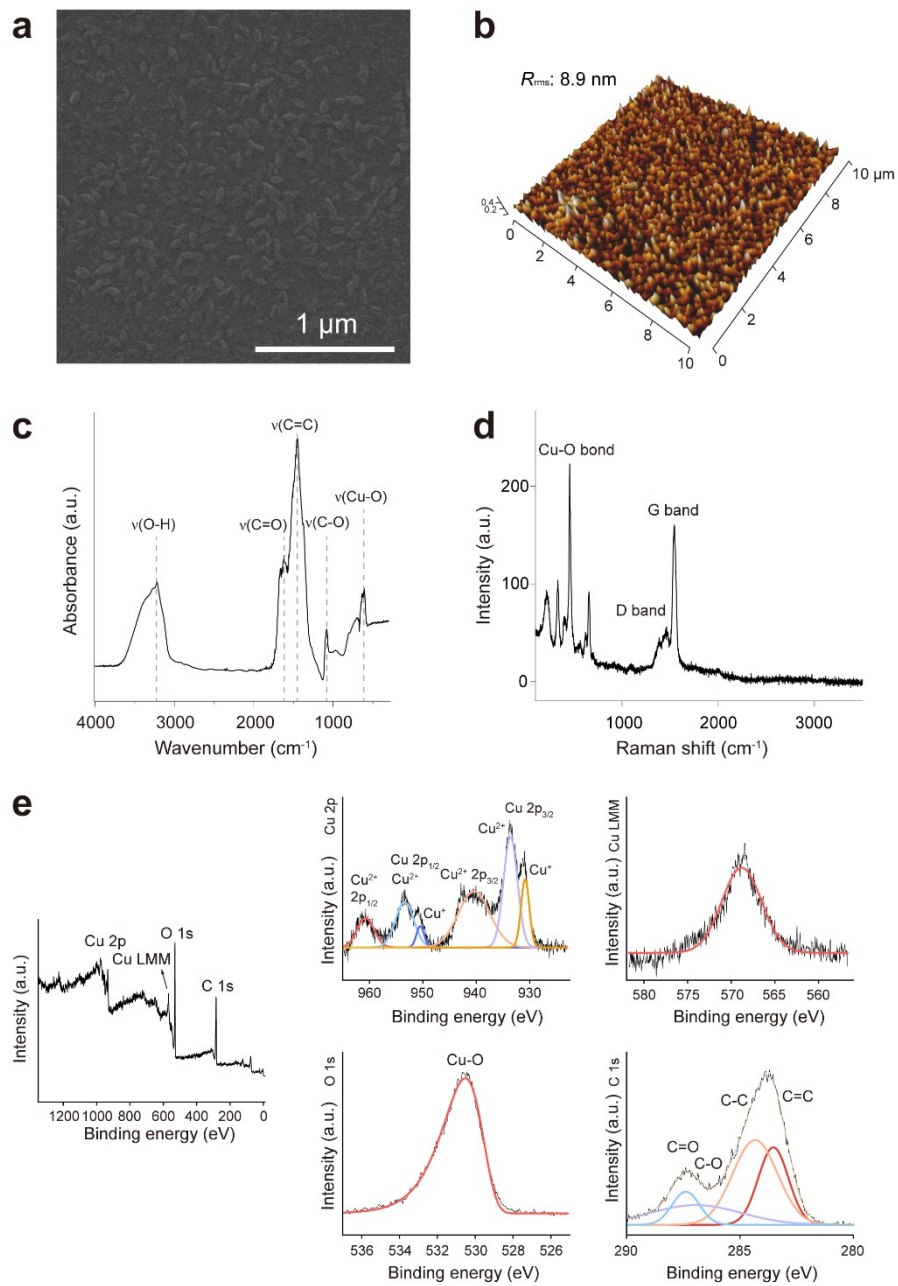

**Fig. S7** a) FE-SEM and b) AFM images, and c) FT-IR, d) Raman, and e) XPS spectra of **[Cu<sup>2+</sup>-THBQ]<sub>10</sub> films on gold substrates.**

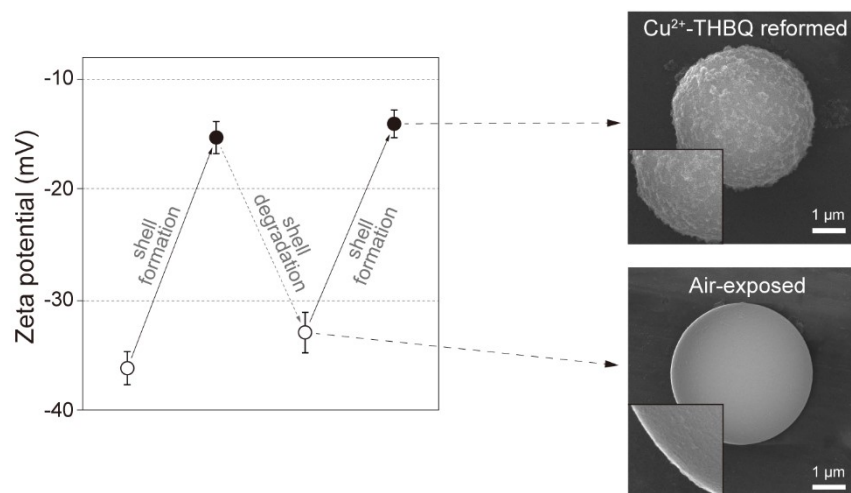

**Fig. S8** Changes in zeta potential and FE-SEM images of PS particles after repetitive shell formation and degradation.

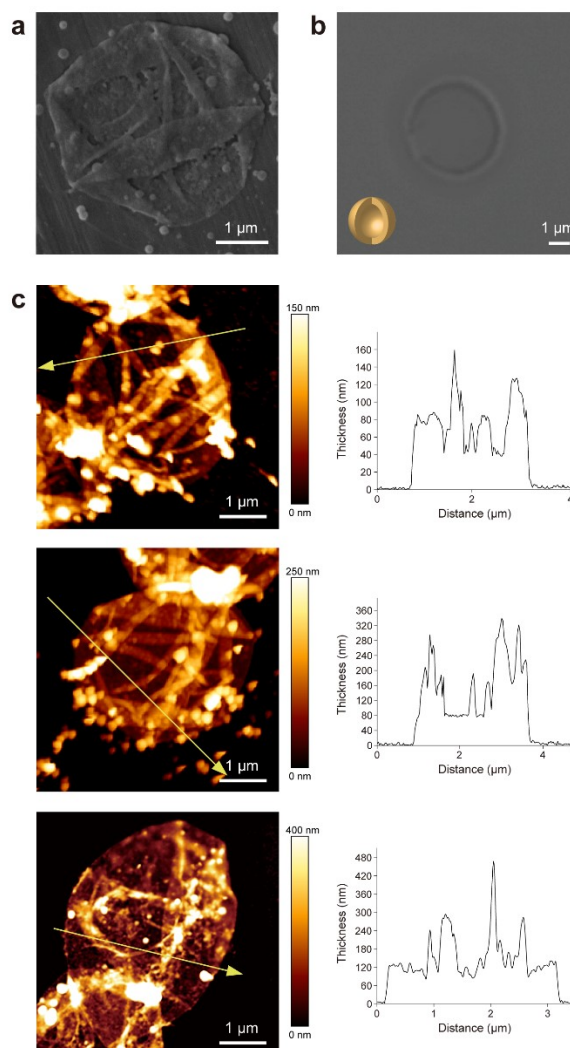

**Fig. S9** a) FE-SEM and b) CLSM images of a hollow Cu<sup>2+</sup>-THBQ MOC capsule. c) AFM images and line-scan thickness profiles of hollow Cu<sup>2+</sup>-THBQ MOC capsules with 1, 2, and 3 depositions (from top to bottom).
